# Supplementary material for: KLF10 Inhibits TGF-β-Mediated Activation of Hepatic Stellate Cells via Suppression of ATF3 Expression
Source: MDPI journal article supplement (doi:10.3390/ijms241612602), 2023-08-09
Supplement: s1 [file s1]

**Supplementary data to International Journal of Molecular Sciences**

**KLF10 inhibits TGF- $\beta$ -mediated activation of hepatic stellate cells via suppression of ATF3 expression**

**Soonjae Hwang <sup>1,†</sup>, Sangbin Park <sup>2,†</sup>, Uzma Yaseen <sup>2</sup>, Ho-Jae Lee <sup>1,2</sup> and Ji-Young Cha <sup>1,2,\*</sup>**

<sup>1</sup> Department of Biochemistry, Lee Gil Ya Cancer and Diabetes Institute, College of Medicine, Gachon University, Incheon 21999, Republic of Korea; soonjae@gachon.ac.kr (S.H.); hojlee@gachon.ac.kr (H.-J.L.)

<sup>2</sup> Department of Health Sciences and Technology, GAIHST, Gachon University, Incheon 21999, Republic of Korea; tree5267@gachon.ac.kr (S.P.); uzmayaseen255@gmail.com (U.Y.)

\* Correspondence: jycha1014@gachon.ac.kr (J.-Y.C); Tel.: +82-32-899-6070

<sup>†</sup> These authors contributed equally to this work.

**Supplementary figure S1. Putative KLF10 binding sites on human and mouse ATF3 promoters.**

**Supplementary figure S2. KLF10 knockdown does not affect apoptosis in LX-2 HSCs.**

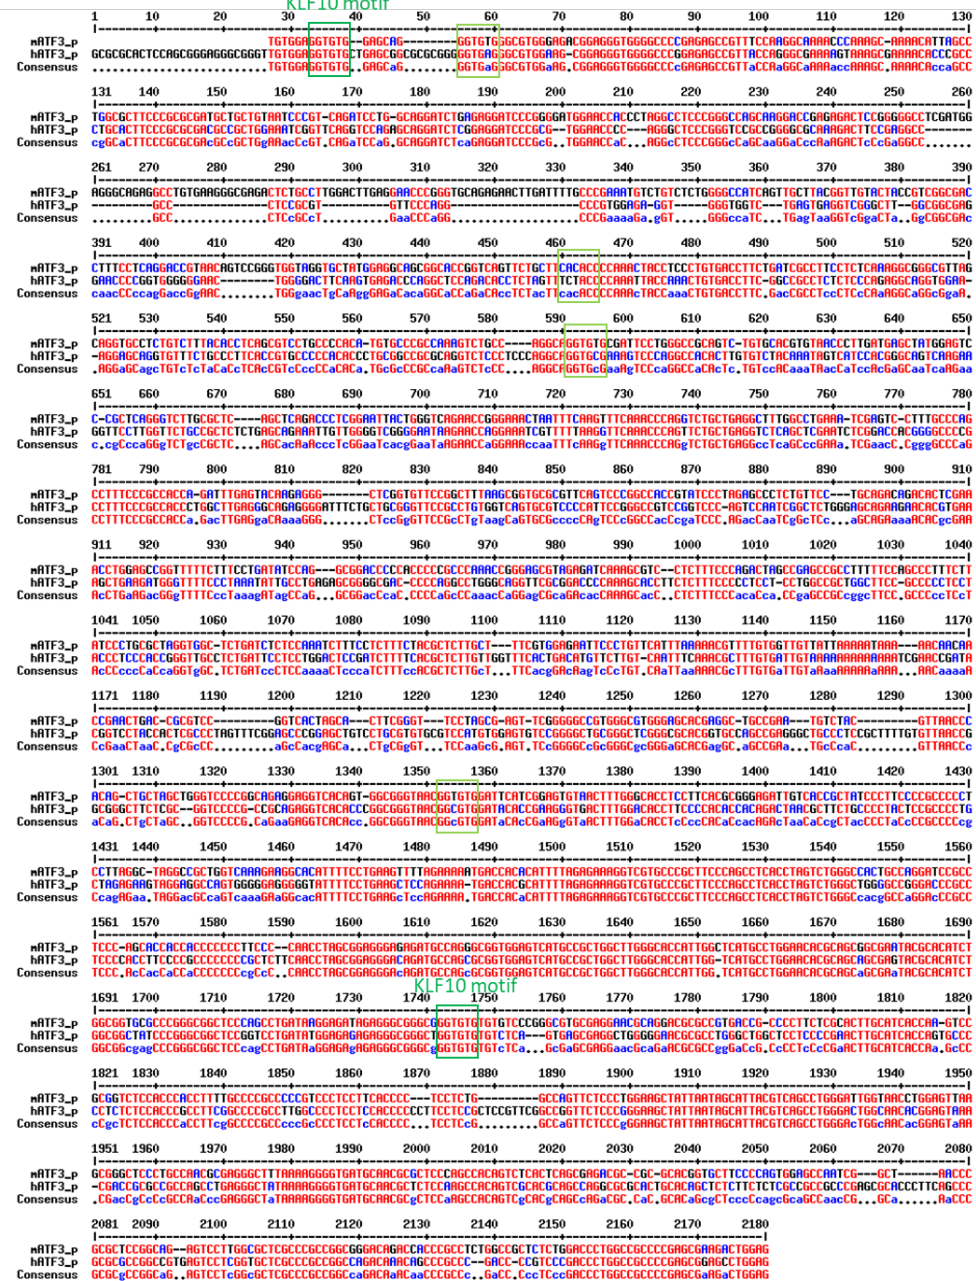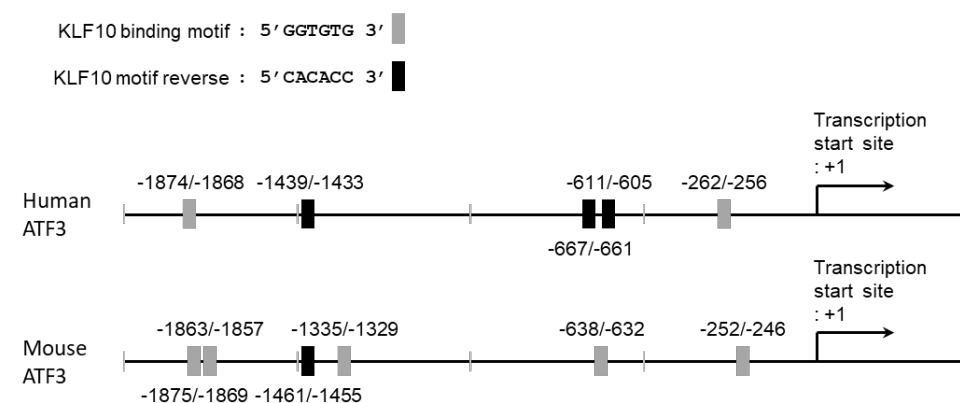

**Figure S1. Putative KLF10 binding sites on human and mouse ATF3 promoters.** (A) ATF3 promoter alignment in human and mouse. The human and mouse ATF3 promoter regions were retrieved from the EPDnew database (<https://epd.expasy.org/epd>). Human and mouse ATF3 alignment demonstrated considerable conservation in both species. (B) Localization of the putative KLF10 binding motifs in the human and mouse ATF3 promoters. KLF10 binding motif, 5'-GGGTGT-3' were obtained from the GeneCards (<https://www.genecards.org/cgi-bin/carddisp.pl?gene=KLF10>). The promoter alignment and motif localization were examined using Vector NTI 7.1 and JASPAR database.

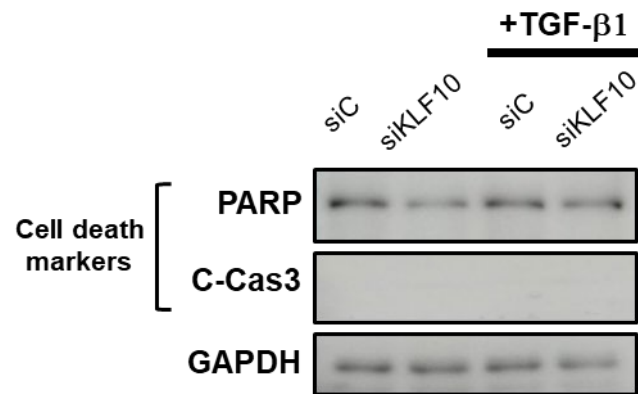

**Figure S2. KLF10 knockdown does not affect cell death in LX-2 HSCs.** LX-2 cells were transfected with siKLF10 (100 pmol) for 48 h and further treated with 10 ng/mL TGF-β1 for another 24 h. Protein levels of Poly (ADP-ribose) polymerase (PARP) and Cleaved caspase 3 (C-Cas3) were determined by Western blotting.
